# Supplementary material for: A murine model demonstrates capsule-independent adaptive immune protection in survivors of Klebsiella pneumoniae respiratory tract infection
Source: Oxford University Press journal article supplement (doi:10.1242/dmm.043240), 2020-03-01
Supplement: dmm043240supp.pdf [file dmm043240supp.pdf]

## SUPPLEMENTAL FIGURES

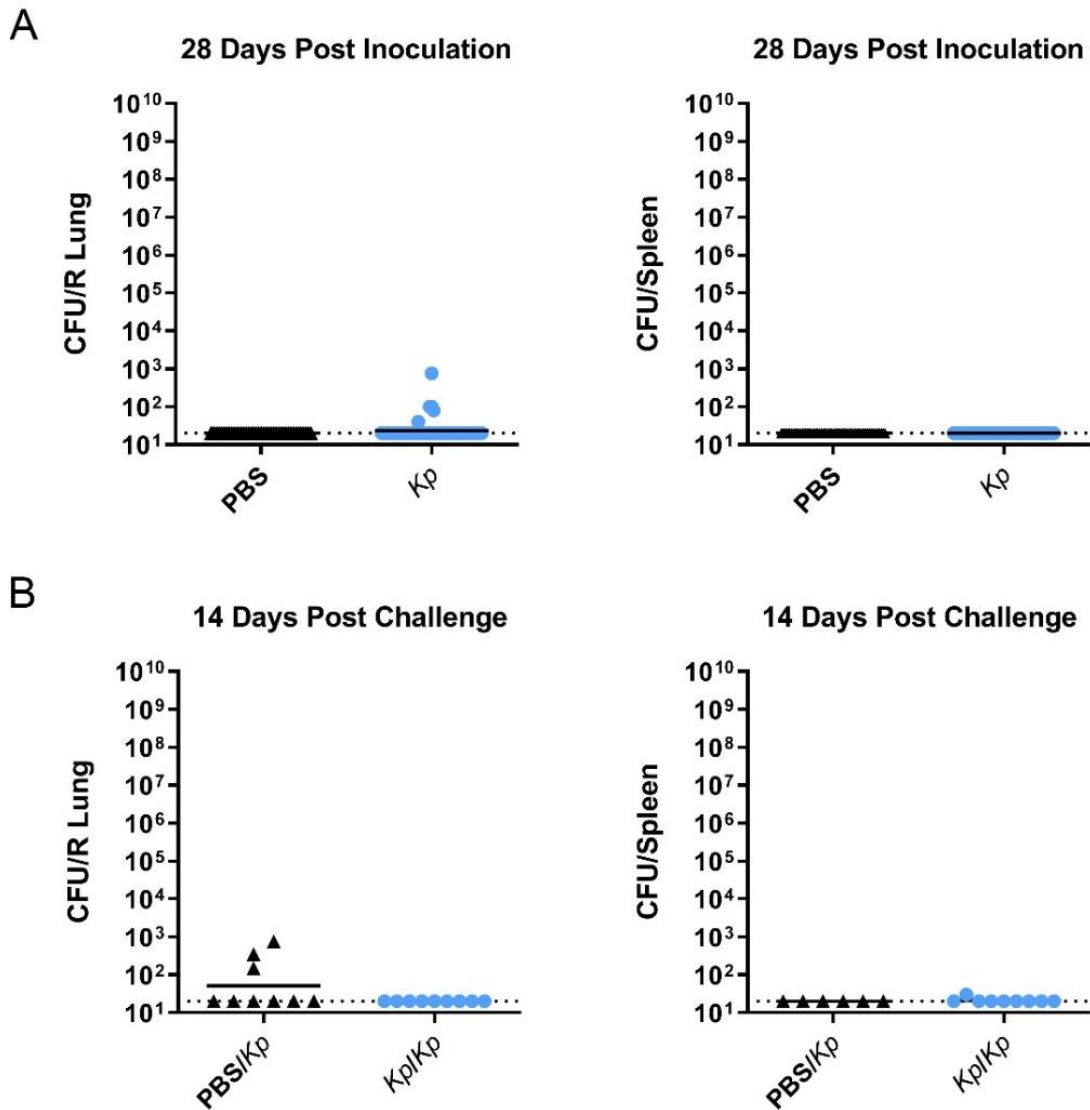

**Figure S1. Survivors of *K. pneumoniae* TOP52 inoculation and challenge demonstrate low or absent lung and spleen bacterial burden.** A. The majority of mice have undetectable or low bacterial titers in their right lung (left panel) or spleen (right panel) 28 days post inoculation with PBS (black) or *Kp* (blue). B. Similarly, the majority of mice have undetectable or low bacterial titers in their right lung (left panel) or spleen (right panel) 14 days post challenge with *Kp*. Data are combined from at least 3 independent experiments. Each symbol represents one animal, short bars represent geometric means of each group, and full dotted horizontal lines represent limits of detection.

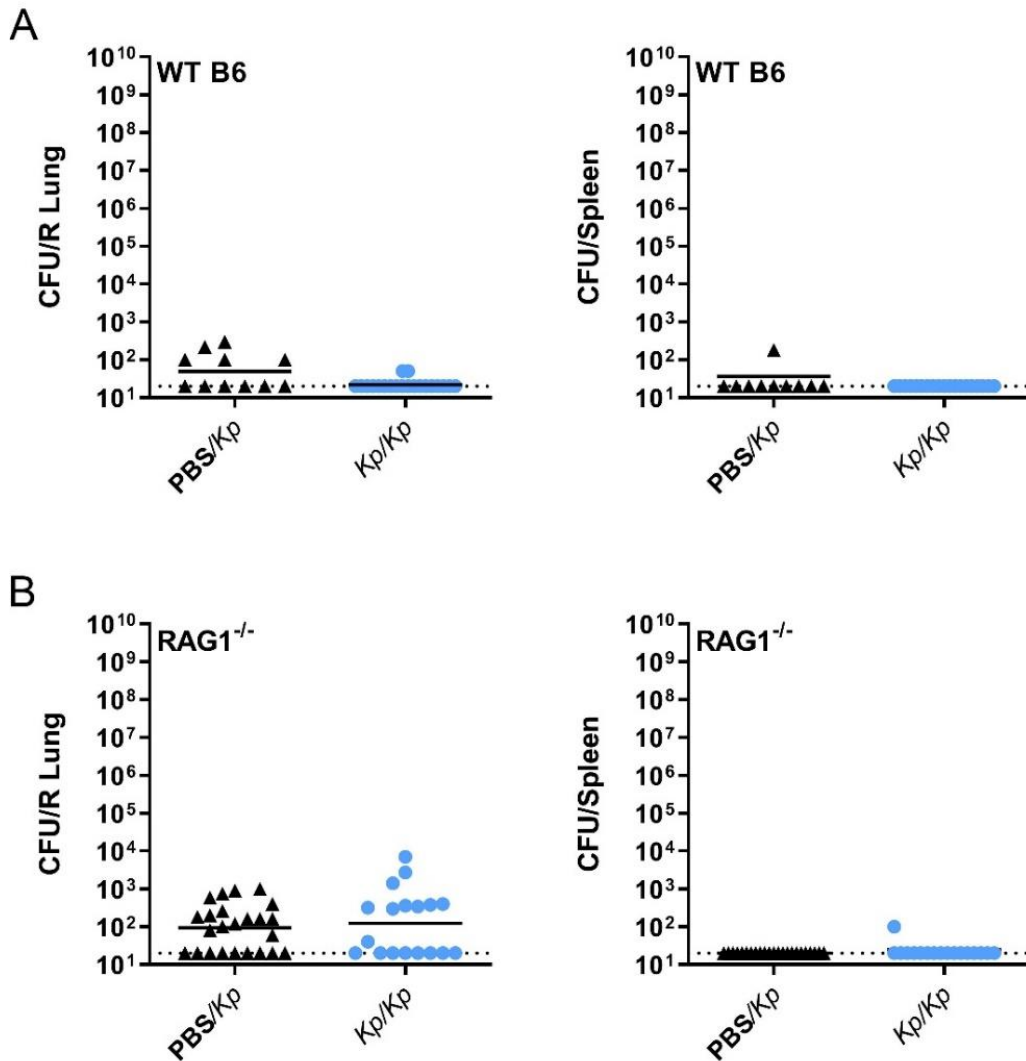

**Figure S2. Both wild-type and RAG1<sup>-/-</sup> survivors of *K. pneumoniae* TOP52 challenge demonstrate low or absent lung and spleen bacterial burden.** A. The majority of wild-type C57BL/6 mice have undetectable or low bacterial titers in their right lung (left panel) and spleen (right panel) 14 days post challenge with *Kp*. B. RAG1<sup>-/-</sup> survivors also have low bacterial titers 14 days post challenge with *Kp* in their right lung and spleen (albeit a higher proportion of mice had detectable lung colonization compared to wild-type C57BL/6 mice at this timepoint). Data are combined from at least 3 independent experiments. Each symbol represents one animal, short bars represent geometric means of each group, and full dotted horizontal lines represent limits of detection.
